# Supplementary material for: Hierarchical three-dimensional NiCo2O4 nanoneedle arrays supported on Ni foam for high-performance supercapacitors
Source: Royal Society of Chemistry journal article supplement (doi:10.1039/c4ra16937a), 2015-01-01
Supplement: c4ra16937a1.pdf [file c4ra16937a1.pdf]

Supporting Information for:

**Hierarchical Three-Dimensional NiCo<sub>2</sub>O<sub>4</sub> nanoneedle arrays  
supported on Ni foam for high-performance supercapacitors**

Jian Wu<sup>a,b</sup>, Rui Mi<sup>b</sup>, Shaomin Li<sup>b</sup>, Pan Guo<sup>a</sup>, Jun Mei<sup>b</sup>, Hao Liu<sup>\*,b</sup>, Woon-Ming

Lau<sup>a,b</sup>, and Li-Min Liu<sup>\*,a</sup>

<sup>a</sup>Beijing Computational Science Research Center, Beijing 100084, China

<sup>b</sup>Chengdu Green Energy and Green Manufacturing Technology R&D Center,  
Chengdu Development Center of Science and Technology of CAEP, Chengdu,  
Sichuan, 610207, China

\*Corresponding author: [mliuhao@gmail.com](mailto:mliuhao@gmail.com), [limin.liu@csrc.ac.cn](mailto:limin.liu@csrc.ac.cn)

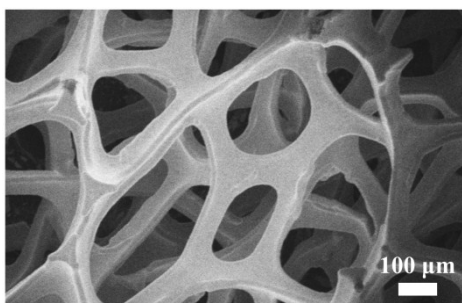

**Fig. S1:** SEM images of clean Ni foam.

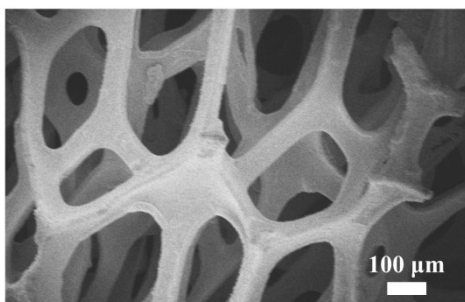

**Fig. S2:** SEM images of NiCo<sub>2</sub>O<sub>4</sub> nanoneedle arrays grow on Ni foam.

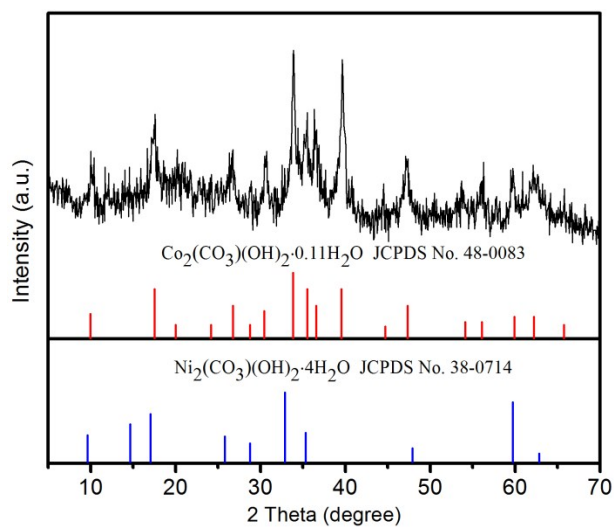

**Fig. S3:** XRD pattern of the as-prepared precursor.

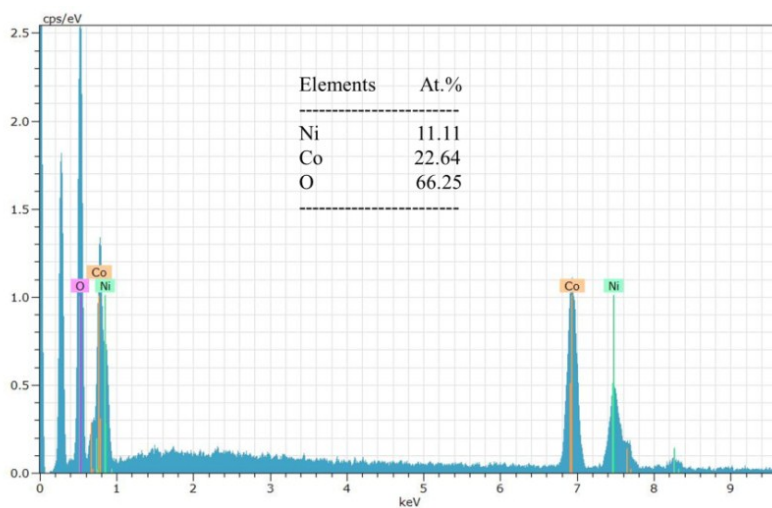

**Fig. S4:** EDX pattern of the  $\text{NiCo}_2\text{O}_4$  nanoneedle arrays.

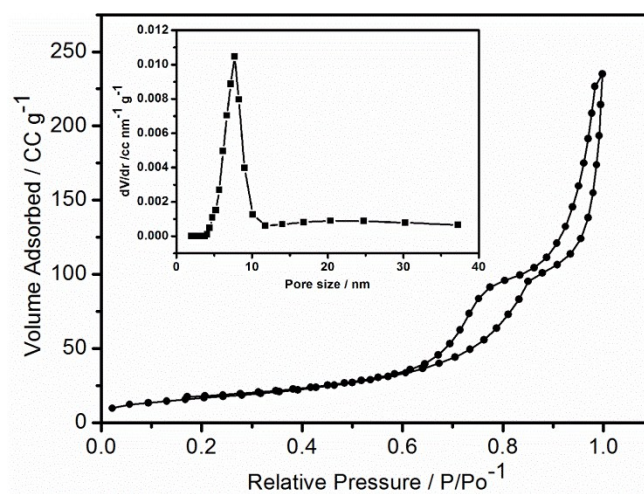

**Fig. S5:** BET isotherm plots and corresponding BJH pore distributions (insets) of the  $\text{NiCo}_2\text{O}_4$  nanoneedle arrays.

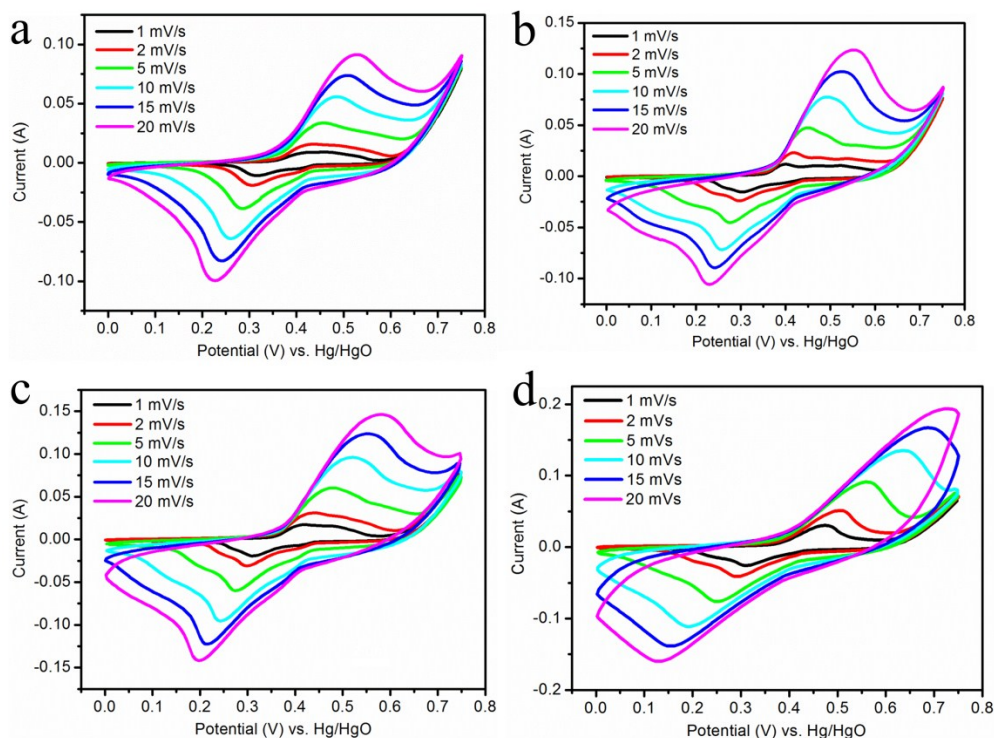

**Fig. S6:** Cyclic voltammetry curves of the hierarchical  $\text{NiCo}_2\text{O}_4$  array electrodes in a three-electrode cell with 2 M KOH aqueous solution at various scan rates: (a) nanosheet (1 h); (b) nanosheet (2 h); (c) nanosheet-nanoneedle (4 h); (d) nanoneedle (8 h) arrays.

**Table S1.** Comparison of the electrochemical performances of the 3D hierarchical  $\text{NiCo}_2\text{O}_4$  nanoneedle arrays with other reported ones.

| Nanostructures                                                   | Areal capacitance                                          | Special capacitance                                        | Mass loading                 | Refs      |
|------------------------------------------------------------------|------------------------------------------------------------|------------------------------------------------------------|------------------------------|-----------|
| $\text{NiCo}_2\text{O}_4$ nanoneedle arrays                      | 3.71 $\text{F}/\text{cm}^2$ at 1 $\text{mA}/\text{cm}^2$   | 2193 $\text{F}/\text{g}$ at 1 $\text{A}/\text{g}$          | 1.64 $\text{mg}/\text{cm}^2$ | This work |
| $\text{NiCo}_2\text{O}_4$ nanoneedle arrays                      | 3.12 $\text{F}/\text{cm}^2$ at 1.1 $\text{mA}/\text{cm}^2$ | 1118.6 $\text{F}/\text{g}$ at 5.56 $\text{mA}/\text{cm}^2$ | 0.9 $\text{mg}/\text{cm}^2$  | [1]       |
| $\text{NiCo}_2\text{O}_4$ nanoneedle arrays                      | 0.41 $\text{F}/\text{cm}^2$ at 10 $\text{mA}/\text{cm}^2$  |                                                            | 0.3 $\text{mg}/\text{cm}^2$  | [2]       |
| $\text{Co}_{0.5}\text{Ni}_{0.5}\text{DHs}/\text{NiC}$ composites | 2.3 $\text{F}/\text{cm}^2$ at 2 $\text{mA}/\text{cm}^2$    |                                                            | 1.0 $\text{mg}/\text{cm}^2$  | [2]       |

---

|                                                         |                                                     |                                        |                                                                                            |     |
|---------------------------------------------------------|-----------------------------------------------------|----------------------------------------|--------------------------------------------------------------------------------------------|-----|
| $NiCo_2O_4$<br>nanoneedle arrays                        | 0.66 F/cm <sup>2</sup> at 2<br>mA/cm <sup>2</sup>   | 660 F/g at 2 A/g                       |                                                                                            | [3] |
| $NiCo_2O_4$ nanowire<br>arrays                          | 2.01 F/cm <sup>2</sup> at 2<br>mA/cm <sup>2</sup>   | ~900 F/g at 10<br>mA/cm <sup>2</sup>   | 1.15<br>mg/cm <sup>2</sup>                                                                 | [4] |
| $NiCo_2O_4@MnO_2$<br>core/shell<br>nanowire arrays      | 3.31 F/cm <sup>2</sup> at 2<br>mA/cm <sup>2</sup>   | 1471.4 F/g at 10<br>mA/cm <sup>2</sup> | 1.4 mg/cm <sup>2</sup>                                                                     | [4] |
| $NiCo_2O_4$<br>nanosheet arrays                         | 3.51 F/cm <sup>2</sup> at 1.8<br>mA/cm <sup>2</sup> | 1743.4 F/g at 7.08<br>A/g              | 1.2 mg/cm <sup>2</sup>                                                                     | [5] |
| $Co_3O_4@NiO$<br>nanowire arrays                        | 2.56 F/cm <sup>2</sup> at 2<br>A/g                  | 853 F/g at 2 A/g                       | ~ 2.1<br>mg/cm <sup>2</sup> for<br>$Co_3O_4$ and<br>~ 0.9<br>mg/cm <sup>2</sup> for<br>NiO | [6] |
| $NiCo_2O_4@NiCo_2O_4$<br>core/shell<br>nanoflake arrays | 2.20 F/cm <sup>2</sup> at 5<br>mA/cm <sup>2</sup>   | 1115.6 F/g at 5<br>mA/cm <sup>2</sup>  | 1.34<br>mg/cm <sup>2</sup> for<br>core and<br>0.63<br>mg/cm <sup>2</sup> for<br>shell      | [7] |

---

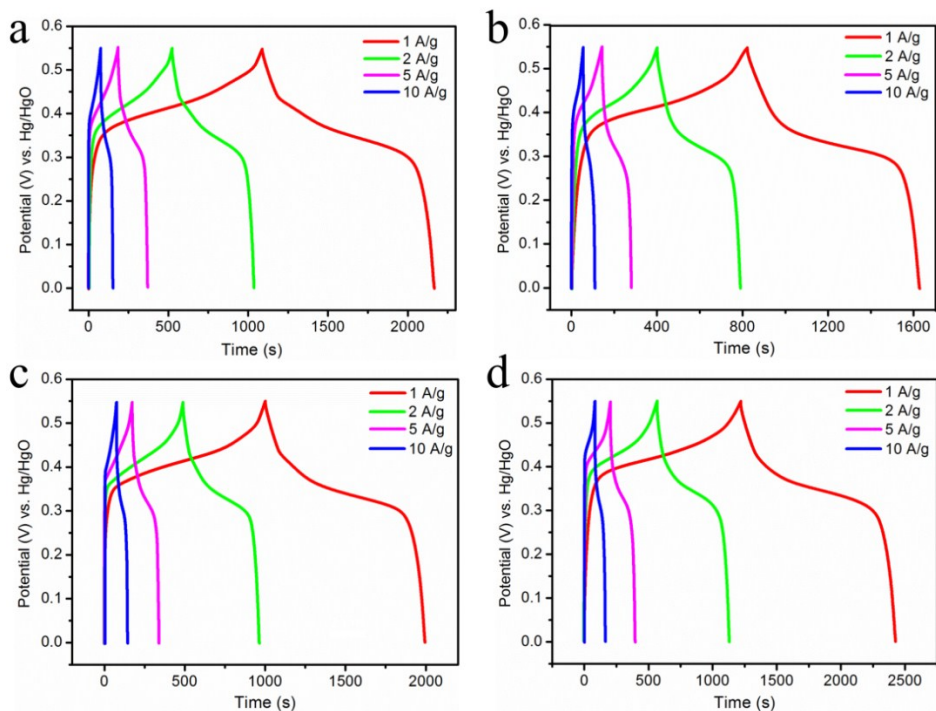

**Fig. S7:** Charge and discharge curves of (a) nanosheets-1, (b) nanosheets-2, (c) nanosheets-nanoneedles, and (d) nanoneedles at different current densities of 1, 2, 5, and 10 A/g.

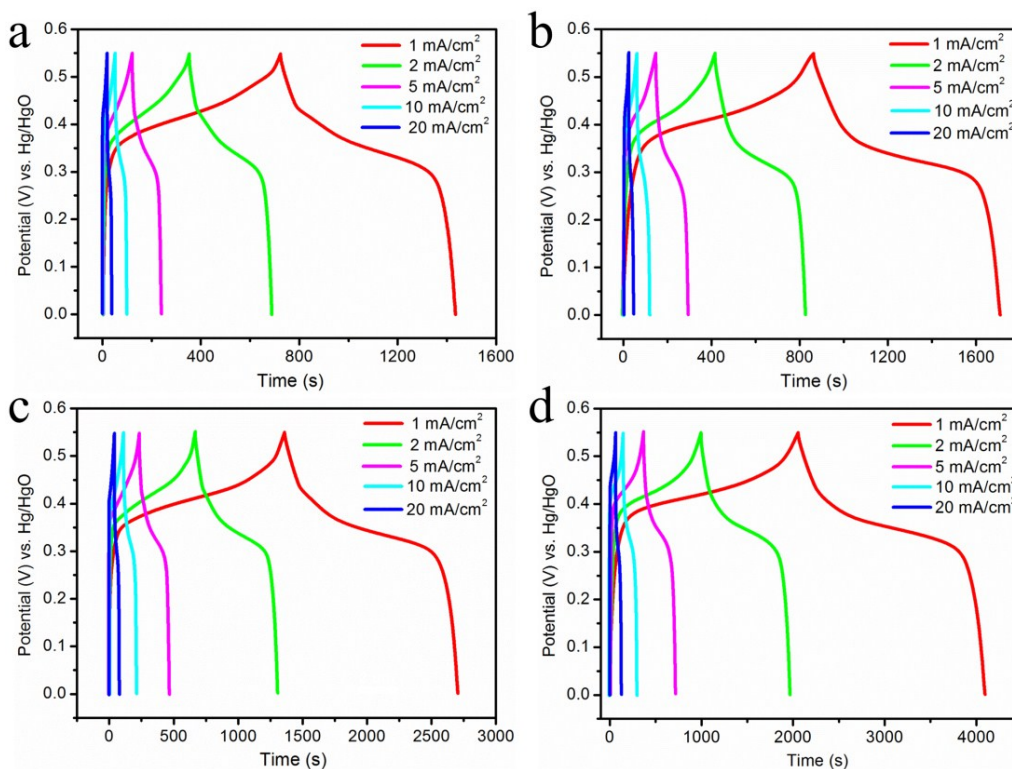

**Fig. S8:** Charge and discharge curves of (a) nanosheets-1, (b) nanosheets-2, (c) nanosheets-nanoneedles, and (d) nanoneedles at different current densities of 1, 2, 5, 10, and 20 mA/cm<sup>2</sup>.

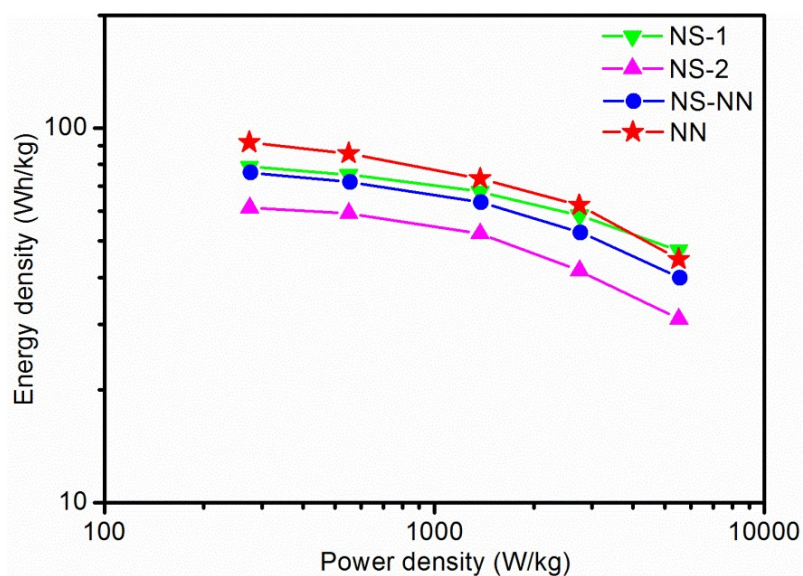

**Fig. S9:** Ragone plot of the power and energy density of (a) nanosheets-1, (b) nanosheets-2, (c) nanosheets-nanoneedles, and (d) nanoneedles at different current densities of 1, 2, 5, 10 and 20 A/g.

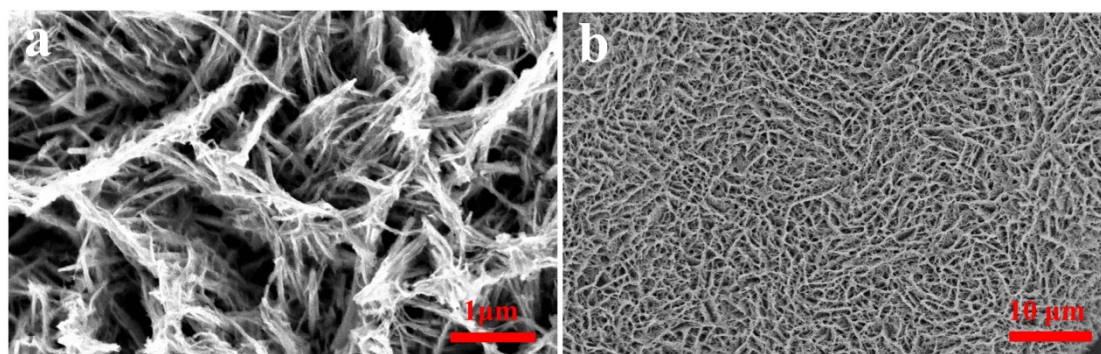

**Fig. S10:** SEM image of  $\text{NiCo}_2\text{O}_4$  nanoneedle arrays after 2000 cycles.

[1] G. Q. Zhang, H. B. Wu, H. E. Hoster, M. B. Chan-Park and X. W. Lou, *Energy Environ. Sci.*, 2012, **5**, 9453-9456.

[2] L. Huang, D. C. Chen, Y. Ding, S. Feng, Z. L. Wang and M. L. Liu, *Nano Lett.*, 2013, **13**, 3135-3139.

- [3] D. Y. Zhang, H. L. Yan, Y. Lu, K. W. Qiu, C. L. Wang, C. C. Tang, Y. H. Zhang, C. W. Cheng, Y. S. Luo, *Nanoscale Res Lett.*, 9 (2014) 139-148.
- [4] L. Yu, G. Q. Zhang, C. Z. Yuan and X. W. Lou, *Chem. Commun.*, 2013, **49**, 137-139.
- [5] G. Q. Zhang, X. W. Lou, *Adv. Mater.*, 25 (2013) 976-979.
- [6] X. H. Xia, J. P. Tu, Y. Q. Zhang, X. H. Wang, C. D. Gu, X.-b. Zhao, H.J. Fan, *ACS Nano*, 6 (2012) 5531-5538.
- [7] X. Y. Liu, S. J. Shi, Q. Q. Xiong, L. Li, Y. J. Zhang, H. Tang, C. D. Gu, X. L. Wang and J. P. Tu, *ACS Appl. Mater. Interfaces*, 2013, **5**, 8790-8795.
